# Supplementary material for: DYRK kinase Pom1 drives F-BAR protein Cdc15 from the membrane to promote medial division
Source: PubMed Central journal article supplement — Mol Biol Cell. 2020 Apr 15;31(9):917–29. doi: 10.1091/mbc.E20-01-0026 (PMC7185970; doi:10.1091/mbc.e20-01-0026), 2020-04-15
Supplement: mbc-31-917-s001.pdf [file mbc-31-917-s001.pdf]

# Supplemental Materials

*Molecular Biology of the Cell*

Bhattacharjee et al.

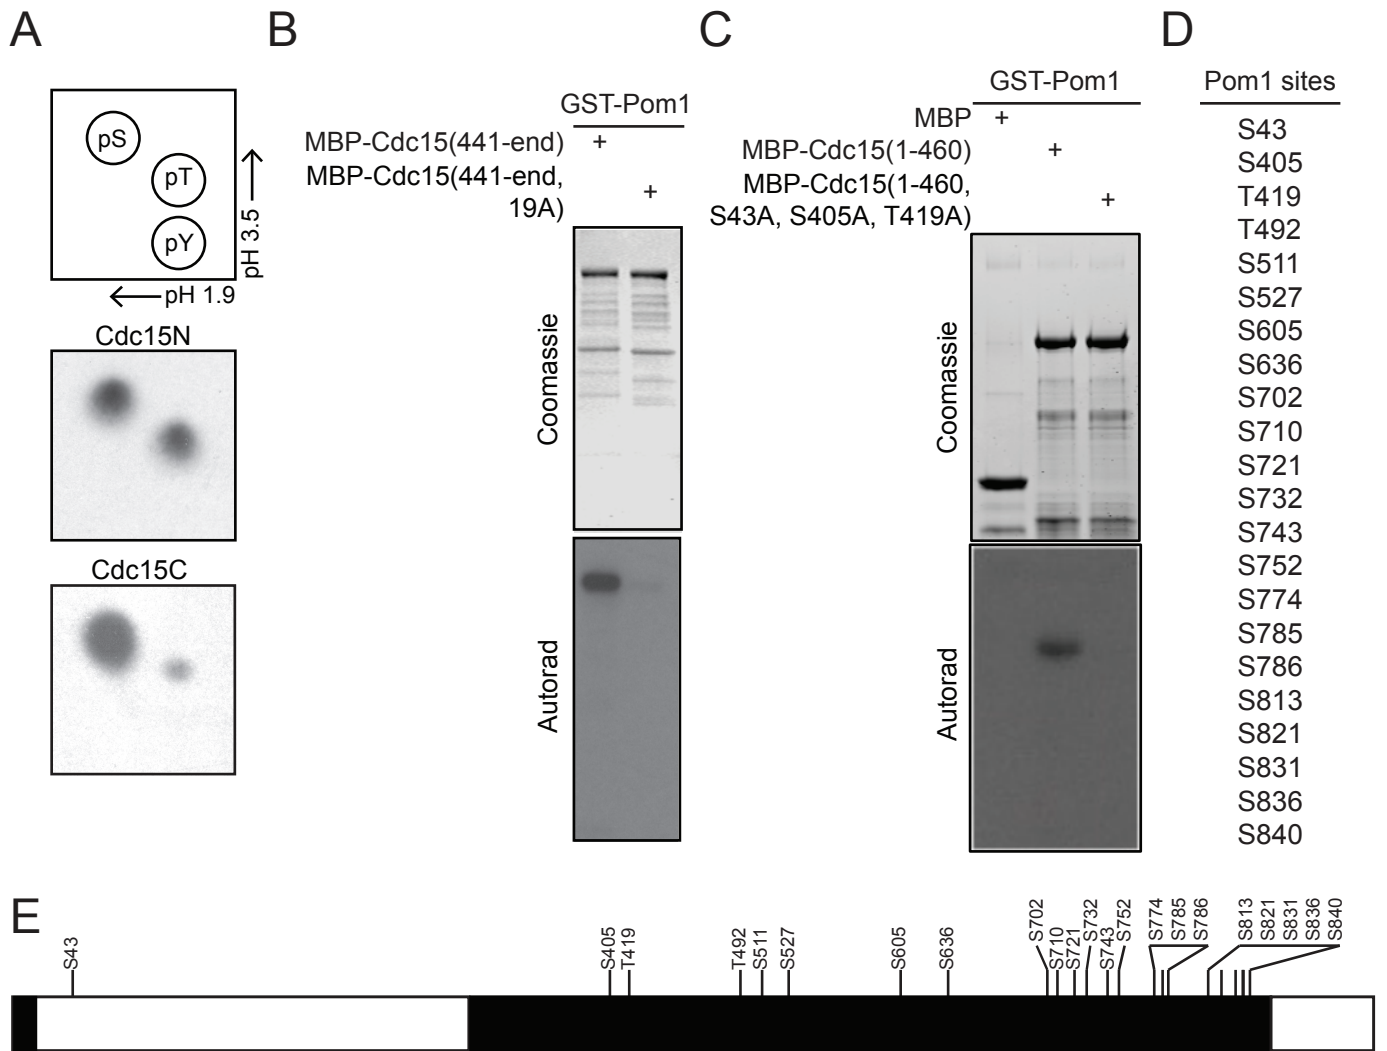

Figure S1

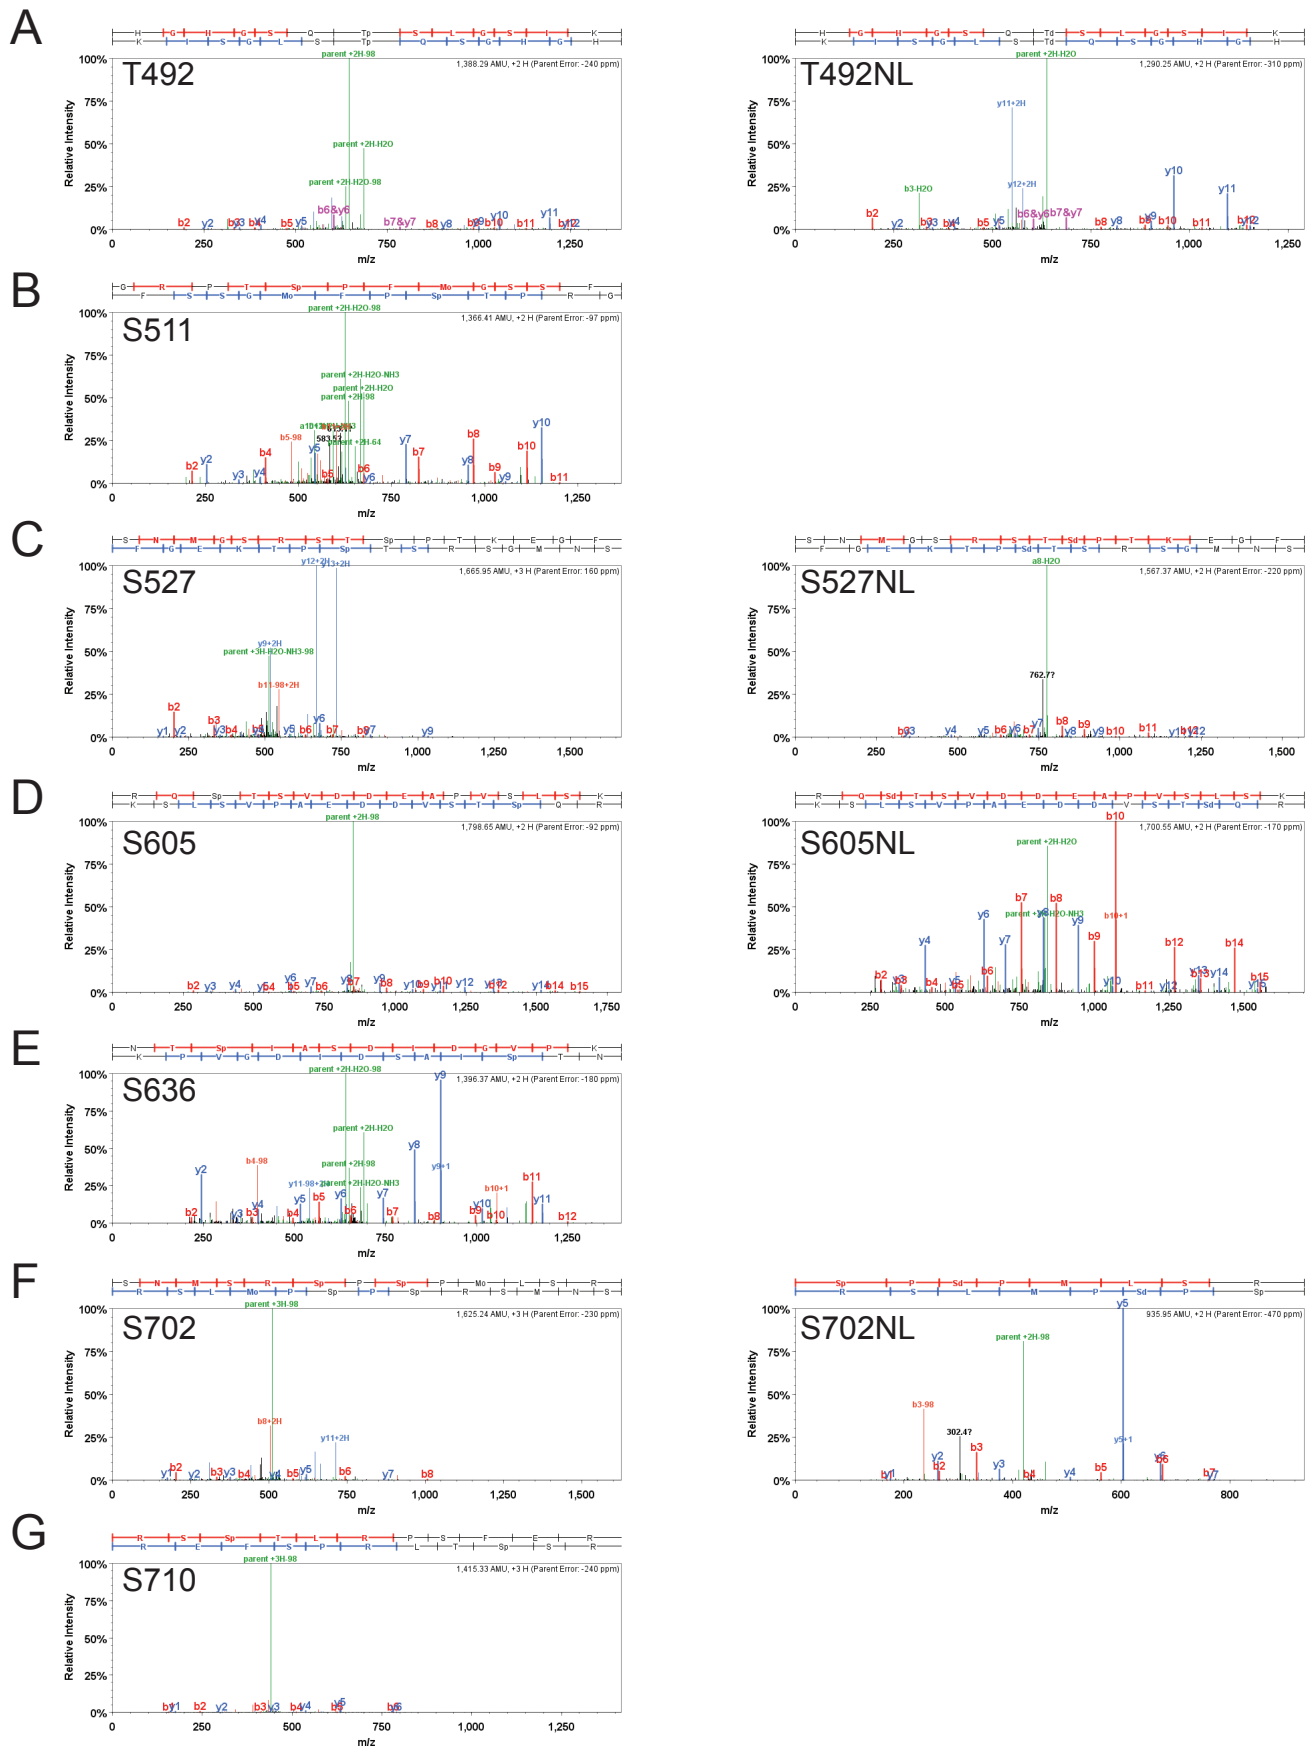

Figure S2

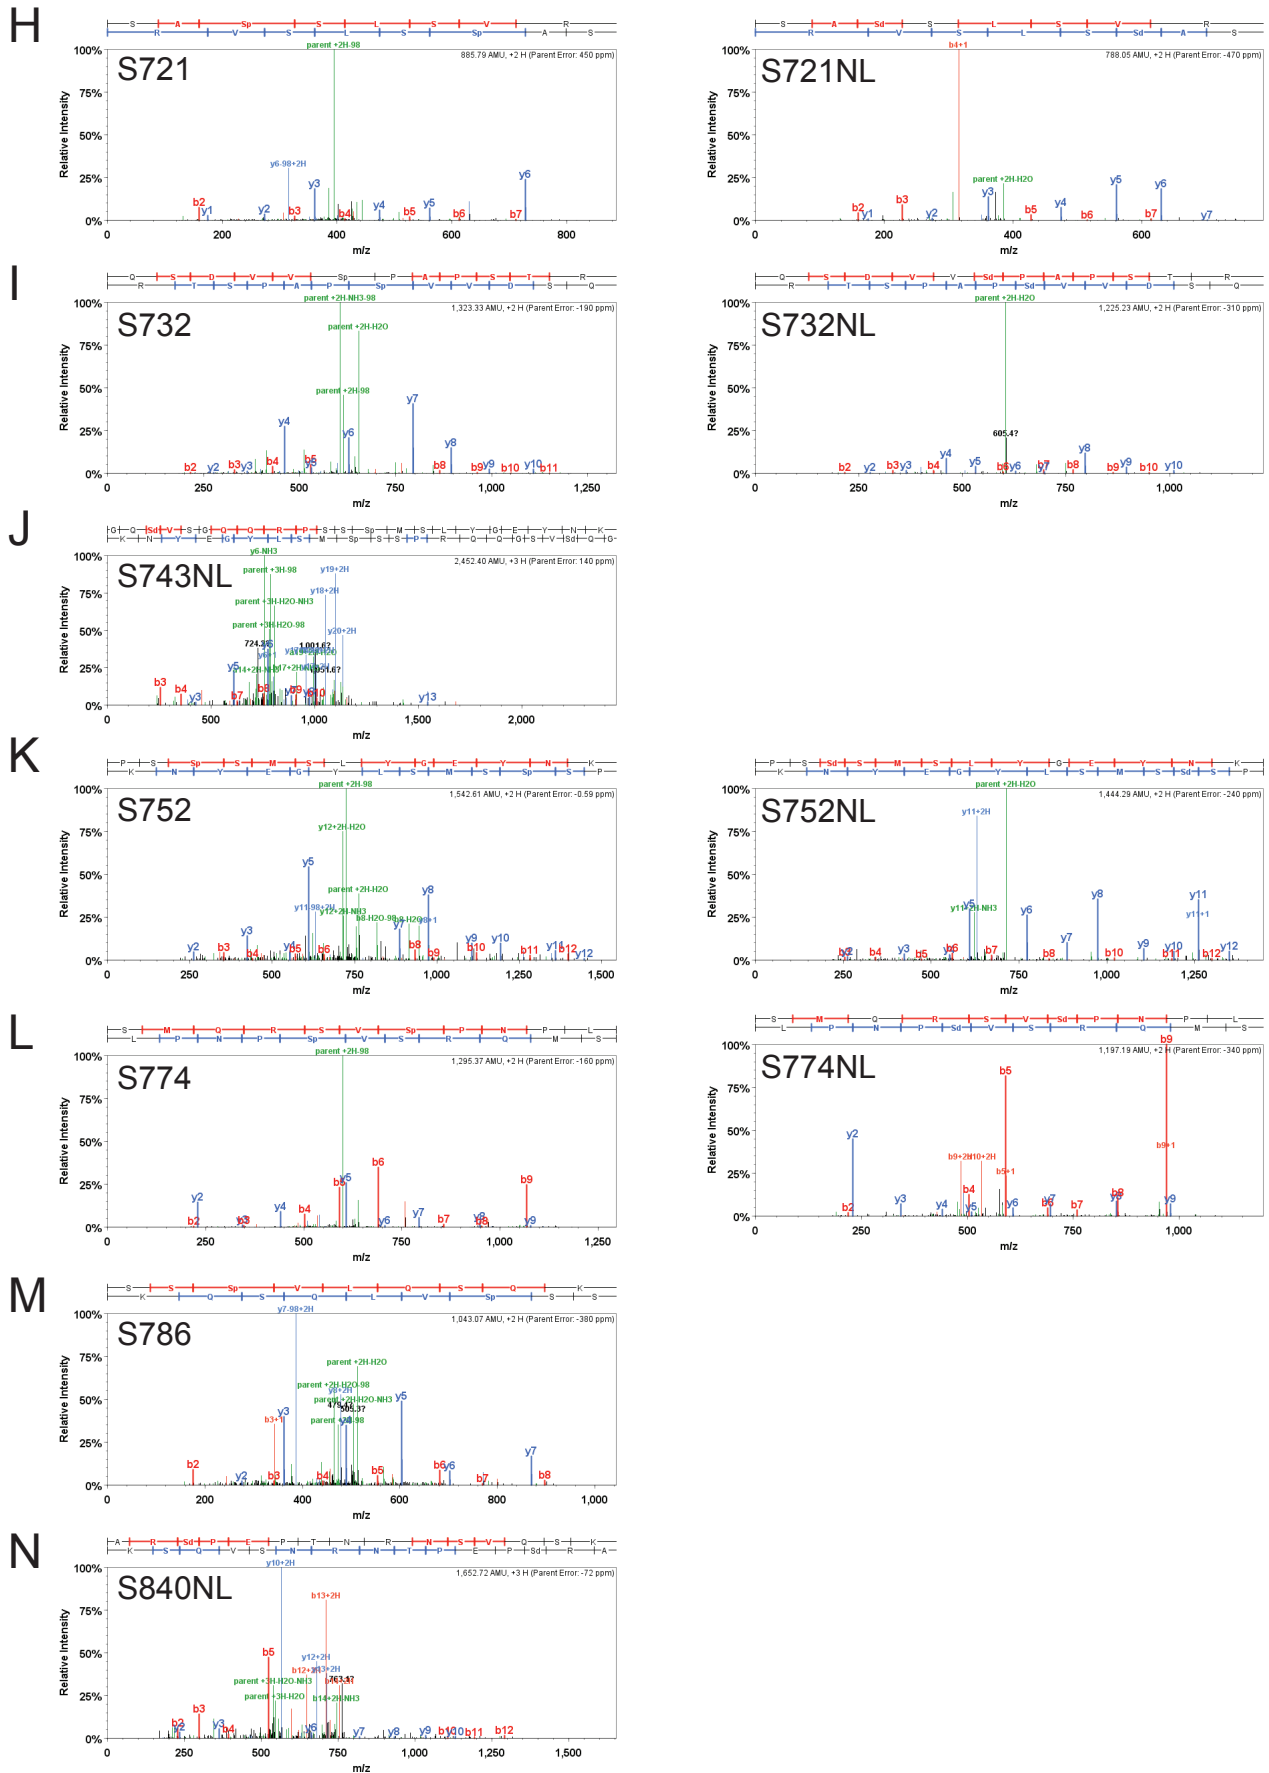

Figure S2-continued

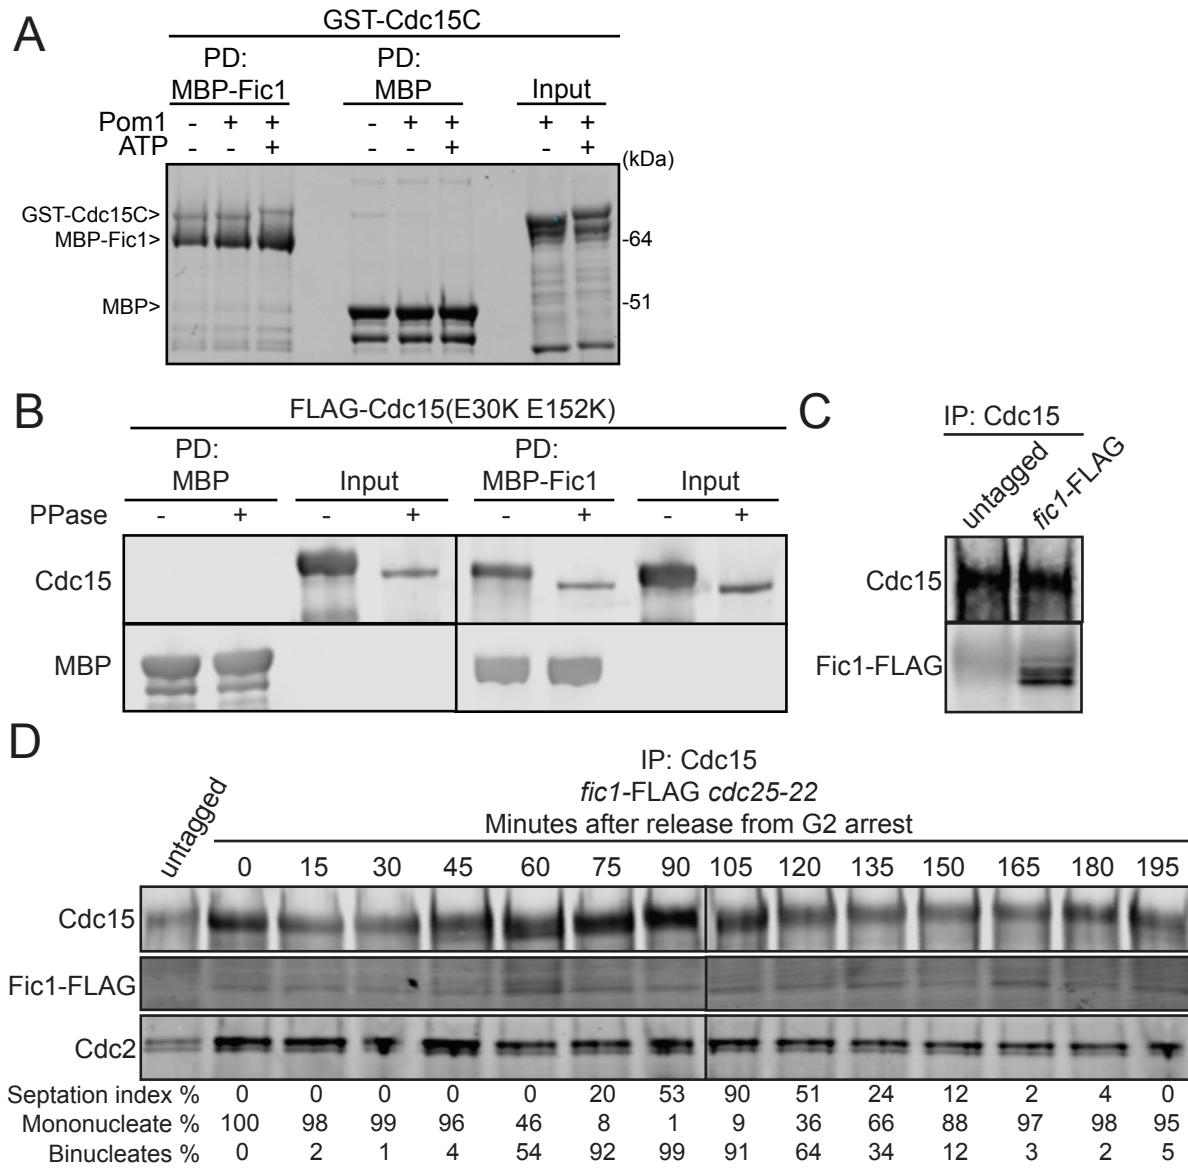

Figure S3

## Supplemental Figure Legends

**Figure S1. Identifying Cdc15 sites phosphorylated by Pom1.** A) Phosphoamino acid analysis of indicated substrates phosphorylated in vitro by GST-Pom1. The positions of standard phosphorylated amino acids are indicated (top). Phosphoamino acids were detected by autoradiography (bottom). Cdc15N, MBP-Cdc15(1-460); Cdc15C, MBP-Cdc15(441-end). B-C) In vitro kinase assays using radiolabeled ATP, recombinant GST-Pom1 and indicated substrate proteins were separated by SDS-PAGE. Coomassie-stained gels of inputs (top) and autoradiography detection of  $^{32}\text{P}$  incorporation (bottom) are shown. D) Table and E) scaled schematic of Cdc15 residues phosphorylated by Pom1 and mutated in the *cdc15-22A* and *cdc15-22D* mutants.

**Figure S2. Identifying Cdc15 sites phosphorylated by Pom1.** A-N) Spectra identifying phosphorylation of the indicated residue.

**Figure S3. Cdc15 and Fic1 interact independently of Cdc15 phosphostatus.** A) Coomassie-stained SDS-PAGE of binding assays between the indicated MBP-tagged and GST-tagged proteins. Amylose resin was used to pull down proteins. B) Full-length Cdc15-E30K E152K co-expressed with Pom1 in bacteria, purified, and treated with lambda phosphatase (PPase) before addition to MBP or MBP-Fic1. Coomassie-stained SDS-PAGE are shown. C) Immunoprecipitation with anti-Cdc15 from the indicated strains was separated by SDS-PAGE and analyzed by immunoblot. D) Cells were arrested in G2 by shifting to 36°C for 3.5 hours. Cells were synchronously released into the cell cycle by downshift to 25°C and samples were collected every 15 minutes. Anti-Cdc15 immunoprecipitates were resolved by SDS-PAGE and analyzed by immunoblotting to detect the indicated proteins. Cell cycle progress was monitored by determining the binucleate and septation indices from fixed cells stained with DAPI and methyl blue.

**Table S1. *S. pombe* strains used in this study**

| Strain number   | Genotype                                                                                                   | Source     |
|-----------------|------------------------------------------------------------------------------------------------------------|------------|
| <b>Figure 1</b> |                                                                                                            |            |
| KGY246          | <i>ade6-M210 ura4-D18 leu1-32 h-</i>                                                                       | Lab stock  |
| KGY2711         | <i>mid1::ura4+ ade6-M210 ura4-D18 leu1-32 h+</i>                                                           | Lab stock  |
| KGY2001-2       | <i>pom1-as1-tdTomato:nat<sub>R</sub> ade6-M210 ura4-D18 leu1-32 h-</i>                                     | This study |
| KGY4951-2       | <i>mid1::ura4+ pom1-as1-tdTomato:nat<sub>R</sub> ade6-M210 ura4-D18 leu1-32 h+</i>                         | This study |
| <b>Figure 2</b> |                                                                                                            |            |
| YSM2629         | <i>ura4-294::nmt82:myo52N-RFP-nup146::ura4+ pom1<sub>as1</sub>-tomato::nat<sub>R</sub></i>                 | This study |
| YSM3695         | <i>ura4-294::nmt82:myo52N-GFP-nup146::ura4+ leu1-32 h+</i>                                                 | This study |
| YSM3696         | <i>pom1::kan<sub>R</sub> ura4-294::nmt82-myo52N-GFP-nup146::ura4+ leu1-32 h-</i>                           | This study |
| <b>Figure 3</b> |                                                                                                            |            |
| KGY4951-2       | <i>mid1::ura4+ pom1-as1-tdTomato:nat<sub>R</sub> ade6-M210 ura4-D18 leu1-32 h+</i>                         | This study |
| KGY5936-2       | <i>mid1::ura4+ pom1-as1-tdTomato:nat<sub>R</sub> cdc15-EGFP:kan<sub>R</sub> ade6-M21X leu1-32 ura4-D18</i> | This study |
| KGY246          | <i>ade6-M210 ura4-D18 leu1-32 h-</i>                                                                       | Lab stock  |
| KGY6924         | <i>pom1::ura4+ leu1-32 ura4-D18 h-</i>                                                                     | Lab stock  |
| KGY11562-2      | <i>cdc15-22A ade6-M210 ura4-D18 leu1-32 h-</i>                                                             | This study |
| KGY11563-2      | <i>cdc15-22D ade6-M210 ura4-D18 leu1-32 h-</i>                                                             | This study |
| <b>Figure 4</b> |                                                                                                            |            |
| KGY246          | <i>ade6-M210 ura4-D18 leu1-32 h-</i>                                                                       | Lab stock  |
| KGY11562-2      | <i>cdc15-22A ade6-M210 ura4-D18 leu1-32 h-</i>                                                             | This study |
| KGY2711         | <i>mid1::ura4+ ade6-M210 ura4-D18 leu1-32 h+</i>                                                           | Lab stock  |
| KGY14292        | <i>cdc15-22A mid1::ura4+ ade6-M210, ura4-D18, leu1-32 h-</i>                                               | This study |
| KGY1498-2       | <i>mNG-cdc15 ade6-M21X ura4-D18 leu1-32 h-</i>                                                             | Lab stock  |
| KGY19616        | <i>mNG-cdc15-22A ade6-M21X ura4-D18 leu1-32 h-</i>                                                         | This study |
| KGY19617        | <i>mNG-cdc15-22D ade6-M21X ura4-D18 leu1-32 h-</i>                                                         | This study |
| KGY14317        | <i>mNG-cdc15 sid4-mNG:kan<sub>R</sub> ade6-M21X ura 4-D18 leu 1-32</i>                                     | This study |
| KGY14306        | <i>mNG-cdc15-22A sid4-mNG:kan<sub>R</sub> ade6-M21X ura 4-D18 leu 1-32</i>                                 | This study |
| KGY14307        | <i>mNG-cdc15-22D sid4-mNG:kan<sub>R</sub> ade6-M21X ura 4-D18 leu 1-32</i>                                 | This study |
| KGY19083        | <i>rlc1-mNG:hyg<sub>R</sub> sid4-mNG:kan<sub>R</sub> ade6-M210 ura4-D18 leu1-32 h+</i>                     | Lab stock  |
| KGY3982-2       | <i>cdc15-22A rlc1-mNG:hyg<sub>R</sub> sid4-mNG:kan<sub>R</sub> ade6-M21X leu1-32 ura4-D18 h?</i>           | This study |
| KGY3984-2       | <i>cdc15-22D rlc1-mNG:hyg<sub>R</sub> sid4-mNG:kan<sub>R</sub> ade6-M21X leu1-32 ura4-D18 h</i>            | This study |
| KGY4951-2       | <i>mid1::ura4+ pom1-as1-tdTomato:nat<sub>R</sub> ade6-M210 ura4-D18 leu1-32 h+</i>                         | This study |

|                  |                                                                                                                |            |
|------------------|----------------------------------------------------------------------------------------------------------------|------------|
| KGY8513-2        | <i>cdc15-22D mid1::ura4+ pom1-as1-tdTomato:natR leu1-32 ade6-M210 ura4-D18 h+</i>                              | This study |
| <b>Figure 6</b>  |                                                                                                                |            |
| KGY246           | <i>ade6-M210 ura4-D18 leu1-32 h-</i>                                                                           | Lab stock  |
| KGY19261         | <i>pxl1::kan<sub>R</sub> ade6-M210 leu1-32 ura4-D18 h-</i>                                                     | Lab stock  |
| KGY2711          | <i>mid1::ura4+ ade6-M210 ura4-D18 leu1-32 h+</i>                                                               | Lab stock  |
| KGY4951-2        | <i>mid1::ura4+ pom1-as1-tdTomato:nat<sub>R</sub> ade6-M210 ura4-D18 leu1-32 h+</i>                             | This study |
| KGY8513-2        | <i>cdc15-22D mid1::ura4+ pom1-as1-tdTomato:nat<sub>R</sub> leu1-32 ade6-210 ura4-D18 h+</i>                    | This study |
| KGY8279-2        | <i>mid1::ura4+ pom1-as1-tdTomato:nat<sub>R</sub> pxl1::kan<sub>R</sub> leu1-32 ade6-210 ura4-D18</i>           | This study |
| KGY19718         | <i>cdc15-22D mid1::ura4+ pom1-as1-tdTomato:nat<sub>R</sub> pxl1::kan<sub>R</sub> leu1-32 ade6-210 ura4-D18</i> | This study |
| KGY6008          | <i>fic1::ura4+ leu1-32 ura4-D18 ade6-M210 h+</i>                                                               | Lab stock  |
| KGY11374         | <i>mid1::ura4+ pom1-as1-tdTomato:nat<sub>R</sub> fic1::ura4+ leu1-32 ade6-210 ura4-D18 h-</i>                  | This study |
| KGY19717         | <i>cdc15-22D mid1::ura4+ pom1-as1-tdTomato:nat<sub>R</sub> fic1::ura4+ leu1-32 ade6-210 ura4-D18</i>           | This study |
| <b>Figure S3</b> |                                                                                                                |            |
| KGY247           | <i>ade6-M210 ura4-D18 leu1-32 h+</i>                                                                           | Lab stock  |
| KGY6288          | <i>fic1-FLAG:kan<sub>R</sub> ade6-M216 leu1-32 ura4-D18 h-</i>                                                 | Lab stock  |
| KGY6659          | <i>cdc25-22 fic1-FLAG:kan<sub>R</sub> ade6-M21X leu1-32 ura4-D18 h-</i>                                        | Lab stock  |
